# Supplementary material for: Early-Life Exposures and Early-Onset Uterine Leiomyomata in Black Women in the Sister Study
Source: PubMed Central journal article supplement (PMC3295338; doi:10.1289/ehp.1103620), 2011-11-02
Supplement: ehp.1103620.s001.pdf [file ehp.1103620.s001.pdf]

## **Supplemental Material**

Early-Life Exposures and Early-Onset Uterine Leiomyomata in Black Women  
in the Sister Study

Aimee A. D'Aloisio, Donna D. Baird, Lisa A. DeRoo, Dale P. Sandler

| <b>Outline</b>                 | <b>Pages</b> |
|--------------------------------|--------------|
| Supplemental Material, Table 1 | 2-3          |
| Supplemental Material, Table 2 | 4            |
| Supplemental Material, Table 3 | 5-6          |

Supplemental Material, Table 1. Risk ratios for early onset uterine fibroids in association with early-life exposures in whites, 35-59 years, in the complete Sister Study cohort, 2003-2009<sup>a</sup>

| Exposure                                 | Total<br>(n = 27,048) <sup>b</sup> | Cases<br>(n) | Adjusted<br>RR | 95% CI     |
|------------------------------------------|------------------------------------|--------------|----------------|------------|
| <b>Maternal Pregnancy Factors:</b>       |                                    |              |                |            |
| <b>Farm<sup>c</sup></b>                  |                                    |              |                |            |
| Work and residence                       | 2,267                              | 180          | 0.99           | 0.85, 1.16 |
| Work only                                | 298                                | 24           | 1.04           | 0.71, 1.53 |
| Residence only                           | 1,033                              | 73           | 0.89           | 0.71, 1.12 |
| No                                       | 22,928                             | 1,739        | 1.00           |            |
| Missing                                  | 522                                | 49           |                |            |
| <b>Smoking<sup>c</sup></b>               |                                    |              |                |            |
| Definitely/probably                      | 9,484                              | 735          | 1.03           | 0.94, 1.13 |
| Definitely not/probably not              | 16,682                             | 1,246        | 1.00           |            |
| Missing                                  | 882                                | 84           |                |            |
| <b>DES use<sup>c</sup></b>               |                                    |              |                |            |
| Definitely/probably                      | 893                                | 102          | 1.53           | 1.27, 1.85 |
| Definitely not/probably not              | 22,641                             | 1,685        | 1.00           |            |
| Missing                                  | 3,514                              | 278          |                |            |
| <b>Diabetes<sup>c</sup></b>              |                                    |              |                |            |
| Any                                      | 245                                | 26           | 1.45           | 1.00, 2.08 |
| Pre-pregnancy                            | 93                                 | 13           | 1.83           | 1.10, 3.03 |
| Gestational                              | 149                                | 13           | 1.22           | 0.72, 2.05 |
| Unknown                                  | 3                                  | 0            |                |            |
| None                                     | 24,838                             | 1,878        | 1.00           |            |
| Missing                                  | 1,965                              | 161          |                |            |
| <b>Hypertensive disorder<sup>c</sup></b> |                                    |              |                |            |
| Any                                      | 957                                | 81           | 1.11           | 0.89, 1.37 |
| Pre-eclampsia                            | 526                                | 45           | 1.10           | 0.83, 1.47 |
| Gestational hypertension                 | 359                                | 32           | 1.19           | 0.86, 1.67 |
| Unknown                                  | 72                                 | 4            |                |            |
| None                                     | 21,216                             | 1,595        | 1.00           |            |
| Missing                                  | 4,875                              | 389          |                |            |
| <b>Participant Factors:</b>              |                                    |              |                |            |
| <b>Maternal age at birth/birth order</b> |                                    |              |                |            |
| <20 years, 1st                           | 794                                | 76           | 1.23           | 0.99, 1.53 |
| ≥20 years, 1st                           | 4,389                              | 358          | 1.09           | 0.98, 1.22 |
| <20 years, 2 <sup>nd</sup> or later      | 219                                | 18           | 1.05           | 0.67, 1.64 |
| ≥20 years, 2 <sup>nd</sup> or later      | 21,646                             | 1,613        | 1.00           |            |
| <b>Birth weight, grams</b>               |                                    |              |                |            |
| <2,500                                   | 1,893                              | 171          | 1.16           | 0.99, 1.35 |
| 2,500-3,999                              | 17,971                             | 1,376        | 1.00           |            |
| ≥4,000                                   | 1,895                              | 141          | 0.98           | 0.83, 1.15 |
| Missing                                  | 5,289                              | 377          |                |            |

Supplemental Material, Table 1 (cont.)

| Exposure                             | Total<br>(n = 27,048) <sup>b</sup> | Cases<br>(n) | Adjusted<br>RR | 95% CI     |
|--------------------------------------|------------------------------------|--------------|----------------|------------|
| Gestational age at birth             |                                    |              |                |            |
| Born early, $\geq 1$ months          | 621                                | 75           | 1.65           | 1.32, 2.05 |
| Born early, 2-4 weeks                | 1,379                              | 110          | 1.11           | 0.92, 1.34 |
| Not $\geq 2$ weeks early             | 13,727                             | 991          | 1.00           |            |
| Missing                              | 11,321                             | 889          |                |            |
| Multiple birth                       |                                    |              |                |            |
| Any                                  | 924                                | 64           | 0.90           | 0.71, 1.15 |
| Monozygotic                          | 382                                | 33           | 1.12           | 0.80, 1.55 |
| Dizygotic                            | 474                                | 29           | 0.80           | 0.56, 1.15 |
| Unknown or polyzygotic               | 68                                 | 2            |                |            |
| None                                 | 26,077                             | 1,996        | 1.00           |            |
| Missing                              | 47                                 | 5            |                |            |
| Fed breast milk <sup>c</sup>         |                                    |              |                |            |
| Definitely/probably                  | 9,805                              | 717          | 0.92           | 0.84, 1.01 |
| Definitely not/probably not          | 15,834                             | 1,237        | 1.00           |            |
| Missing                              | 1,409                              | 111          |                |            |
| Fed soy formula <sup>c</sup>         |                                    |              |                |            |
| Definitely/probably                  | 857                                | 84           | 1.33           | 1.08, 1.64 |
| Definitely not/probably not          | 22,061                             | 1,654        | 1.00           |            |
| Missing                              | 4,130                              | 327          |                |            |
| Fed soy formula, age $\leq 2$ months |                                    |              |                |            |
| Yes                                  | 492                                | 51           | 1.43           | 1.10, 1.86 |
| No                                   | 22,349                             | 1,677        | 1.00           |            |
| Missing                              | 4,207                              | 337          |                |            |

Abbreviations: risk ratio, RR; CI, confidence interval; DES, diethylstilbestrol.

<sup>a</sup> Early onset uterine fibroid status was based on self-reported diagnosis at  $\leq 35$  years of age (adjusted: n = 2,065).

<sup>b</sup> Each adjusted model included the following core variables: participant's age and education, maternal age/birth order index, and childhood family income. Women with missing data for core variables were excluded from all models.

<sup>c</sup> Definitely and probably were combined as affirmative responses, and probably not and definitely not were combined as negative responses.

Supplemental Material, Table 2. Risk ratios early onset uterine fibroids in association with childhood socioeconomic and developmental factors in whites, 35-59 years, in the complete Sister Study cohort, 2003-2009<sup>a</sup>

| Exposure                                        | Total<br>(n = 27,048) <sup>b</sup> | Cases<br>(n) | Adjusted<br>RR | 95% CI     |
|-------------------------------------------------|------------------------------------|--------------|----------------|------------|
| Maximum household education, participant age 13 |                                    |              |                |            |
| < High school                                   | 2,592                              | 245          | 1.20           | 1.05, 1.37 |
| ≥ High school                                   | 24,330                             | 1,809        | 1.00           |            |
| Missing                                         | 126                                | 11           |                |            |
| Family income                                   |                                    |              |                |            |
| Poor                                            | 1,169                              | 110          | 1.22           | 1.01, 1.47 |
| Low                                             | 5,843                              | 466          | 1.05           | 0.95, 1.16 |
| Middle/well off                                 | 20,036                             | 1,489        | 1.00           |            |
| Not enough to eat                               |                                    |              |                |            |
| Yes                                             | 1,994                              | 199          | 1.26           | 1.08, 1.47 |
| No                                              | 25,048                             | 1,865        | 1.00           |            |
| Missing                                         | 6                                  | 1            |                |            |
| Height relative to peers, age 10                |                                    |              |                |            |
| Taller                                          | 7,978                              | 619          | 1.05           | 0.95, 1.16 |
| Same                                            | 12,252                             | 915          | 1.00           |            |
| Shorter                                         | 6,793                              | 530          | 1.05           | 0.95, 1.16 |
| Missing                                         | 25                                 | 1            |                |            |
| Weight relative to peers, age 10                |                                    |              |                |            |
| Heavier                                         | 5,458                              | 429          | 1.06           | 0.95, 1.18 |
| Same                                            | 12,505                             | 931          | 1.00           |            |
| Lighter                                         | 9,047                              | 701          | 1.04           | 0.94, 1.14 |
| Missing                                         | 38                                 | 4            |                |            |

Abbreviations: risk ratio, RR; CI, confidence interval.

<sup>a</sup> Early onset uterine fibroid status was based on self-reported diagnosis at ≤ 35 years of age (adjusted: n = 2,065).

<sup>b</sup> Each adjusted model included the following core variables: participant's age and education, maternal age/birth order index, and childhood family income. Women with missing data for core variables were excluded from all models.

Supplemental Material, Table 3. Multiple imputation of missing data for early-life exposures in association with early onset fibroids in blacks, 35-59 years, in the Sister Study, 2003-2009<sup>a</sup>

| Exposure                            | Imputed % | Imputed (n = 3,534) <sup>b</sup> |            |
|-------------------------------------|-----------|----------------------------------|------------|
|                                     |           | RR                               | 95% CI     |
| <b>Maternal Pregnancy Factors:</b>  |           |                                  |            |
| Farm <sup>c</sup>                   | 11        |                                  |            |
| Work and residence                  |           | 0.91                             | 0.71, 1.16 |
| Work only                           |           | 0.93                             | 0.55, 1.56 |
| Residence only                      |           | 1.51                             | 1.05, 2.16 |
| None                                |           | 1.00                             |            |
| Smoking <sup>c</sup>                | 15        |                                  |            |
| Definitely/probably                 |           | 1.14                             | 0.95, 1.37 |
| Definitely not/probably not         |           | 1.00                             |            |
| DES use <sup>c</sup>                | 30        |                                  |            |
| Definitely/probably                 |           | 1.75                             | 1.11, 2.74 |
| Definitely not/probably not         |           | 1.00                             |            |
| Diabetes <sup>c</sup>               | 23        |                                  |            |
| Any                                 |           | 1.39                             | 0.83, 2.30 |
| Pre-pregnancy                       |           | 1.35                             | 0.67, 2.72 |
| Gestational                         |           | 1.44                             | 0.66, 3.17 |
| None                                |           | 1.00                             |            |
| Hypertensive disorder <sup>c</sup>  | 36        |                                  |            |
| Any                                 |           | 1.25                             | 0.92, 1.69 |
| Pre-eclampsia                       |           | 1.20                             | 0.74, 1.94 |
| Gestational hypertension            |           | 1.28                             | 0.88, 1.86 |
| None                                |           | 1.00                             |            |
| <b>Participant Factors:</b>         |           |                                  |            |
| Maternal age at birth/birth order   | 9         |                                  |            |
| <20 years, 1st                      |           | 1.38                             | 1.04, 1.83 |
| ≥20 years, 1st                      |           | 0.83                             | 0.60, 1.15 |
| <20 years, 2 <sup>nd</sup> or later |           | 1.04                             | 0.70, 1.55 |
| ≥20 years, 2 <sup>nd</sup> or later |           | 1.00                             |            |
| Birth weight, grams                 | 42        |                                  |            |
| <2,500                              |           | 1.32                             | 1.03, 1.69 |
| 2,500-3,999                         |           | 1.00                             |            |
| ≥4,000                              |           | 0.90                             | 0.55, 1.47 |
| Gestational age at birth            | 68        |                                  |            |
| Born early, ≥1 months               |           | 1.54                             | 1.06, 2.24 |
| Born early, 2-4 weeks               |           | 1.10                             | 0.63, 1.91 |
| Not ≥2 weeks early                  |           | 1.00                             |            |
| Multiple birth                      | 7         |                                  |            |
| Any                                 |           | 1.39                             | 1.00, 1.93 |
| Monozygotic                         |           | 1.89                             | 1.27, 2.80 |
| Dizygotic                           |           | 0.95                             | 0.54, 1.69 |
| None                                |           | 1.00                             |            |

Supplemental Material, Table 3 (cont.)

| Exposure                     | Imputed<br>% | Imputed (n = 3,534) <sup>b</sup> |            |
|------------------------------|--------------|----------------------------------|------------|
|                              |              | RR                               | 95% CI     |
| Fed breast milk <sup>c</sup> | 17           |                                  |            |
| Definitely/probably          |              | 1.19                             | 1.00, 1.41 |
| Definitely not/probably not  |              | 1.00                             |            |
| Fed soy formula <sup>c</sup> | 24           |                                  |            |
| Definitely/probably          |              | 1.30                             | 0.82, 2.06 |
| Definitely not/probably not  |              | 1.00                             |            |

Abbreviations: risk ratio, RR; CI, confidence interval; DES, diethylstilbestrol.

<sup>a</sup> Early onset uterine fibroid status was based on self-reported diagnosis at  $\leq 30$  years of age. Multiple imputation by chained equations (MICE) was performed using IVEware Version 0.1 with n = 10 imputations and n = 10 iterations. All early-life factors shown in this table, maternal vital status at baseline, early onset fibroid status, childhood family income, and participant's age and highest level of education were included in the multiple imputation regression model.

<sup>b</sup> Each log-binomial regression model included the following core variables: participant's age and education and maternal age/birth order index. Log-binomial regression estimates for each early-life factor were combined for the 10 imputation datasets using PROC MIANALYZE in SAS Version 9.2.

<sup>c</sup> Definitely and probably were combined as affirmative responses, and probably not and definitely not were combined as negative responses.
